# Supplementary material for: Preparation and comparison of bulk and membrane hydrogels based on Kraft- and ionic-liquid-isolated lignins
Source: Royal Society of Chemistry journal article supplement (doi:10.1039/c6gc01339b), 2016-01-01
Supplement: c6gc01339b1.pdf [file c6gc01339b1.pdf]

## Electronic Supporting Information

### Preparation and comparison of bulk and membrane gels based on Kraft- and ionic-liquid-isolated lignins

Xiaoping Shen,<sup>a,b</sup> Paula Berton,<sup>a,c</sup> Julia L. Shamshina,<sup>d</sup> Robin D. Rogers<sup>a,c,1</sup>

<sup>a</sup> Department of Chemistry, The University of Alabama, Tuscaloosa, AL 35487, USA

<sup>b</sup> Key Laboratory of Bio-based Material Science and Technology (Ministry of Education), Northeast Forestry University, 26 Hexing Road, Harbin 150040, China

<sup>c</sup> Department of Chemistry, McGill University, 801 Sherbrooke St. West, Montreal, QC H3A 0B8, Canada

<sup>d</sup> 525 Solutions, Inc., 720 2<sup>nd</sup> Street, Tuscaloosa, AL 35401, USA

---

<sup>1</sup>Corresponding author; E-mail: robin.rogers@mcgill.ca

**EXPERIMENTAL**

**Fourier-Transform Infra-Red Spectroscopy (FT-IR).** FT-IR spectra of ETPEG, lignin, and lignin/ETPEG hydrogels (air-dried) were recorded in the range of 500–4000  $\text{cm}^{-1}$  using a Bruker Alpha FT-IR instrument (Bruker Optics Inc., Billerica, MA, USA) with an attenuated total reflectance (ATR) sampler.

**Powder X-Ray Diffraction (PXRD).** PXRD analysis of lignin powder was performed at room temperature using a Rigaku D/MAX-2BX horizontal X-ray diffractometer (Rigaku Co., Spring, TX, USA) equipped with Cu-K $\alpha$  radiation ( $\lambda=1.5418 \text{ \AA}$ ). The samples were scanned within 5–30° (2 $\theta$ ) in continuous mode with a step size of 0.02° and step time of 3 degrees  $\text{s}^{-1}$ .

**Synthesis of epoxide terminated PEG (ETPEG).** ETPEG was synthesized by a slightly modified, reported procedure.<sup>1</sup> NaOH (1.80 g; 45 mmol) and ECH (4.16 g; 45 mmol) were transferred into a round-bottom flask equipped with a Teflon-coated magnetic stirring bar, under magnetic stirring. PEG (15 mmol PEG<sub>400</sub> or PEG<sub>1000</sub>: 6.0 or 15.0 g, respectively) was then added, and the mixture was stirred at 40 °C for 2 h. After the reaction time, the resultant mixture was dissolved in acetonitrile, followed by centrifugation to remove excess NaOH and the byproduct NaCl. Acetonitrile was then evaporated under reduced pressure using a rotary evaporator at 50 °C. The resulting products were coded as ETPEG<sub>400</sub> and ETPEG<sub>1000</sub>, respectively, and used without further purification. The degree of substitution (DS; substituting –OH with –OCH<sub>2</sub>CHCH<sub>2</sub>O) of the product was calculated using eqn. (S1):

$$DS (\%) = \frac{\Delta m}{n_{\text{PEG}} \times 2 \times (73 - 17)} \times 100\% \quad (\text{S1})$$

where  $\Delta m$  (g) is the mass gain of ETPEG relative to the original PEG added,  $n_{\text{PEG}}$  (mol) is the mol number of original PEG (considered to be equal to the mole number of ETPEG), 17 and 73  $\text{g mol}^{-1}$  are the molecular weight of –OH and –OCH<sub>2</sub>CHCH<sub>2</sub>O– groups, respectively. Both ETPEG<sub>400</sub> and ETPEG<sub>1000</sub> had a high DS, calculated to be 80(3)% and 75(2)%, respectively.

## RESULTS AND DISCUSSION

### *PXRD of lignin powders*

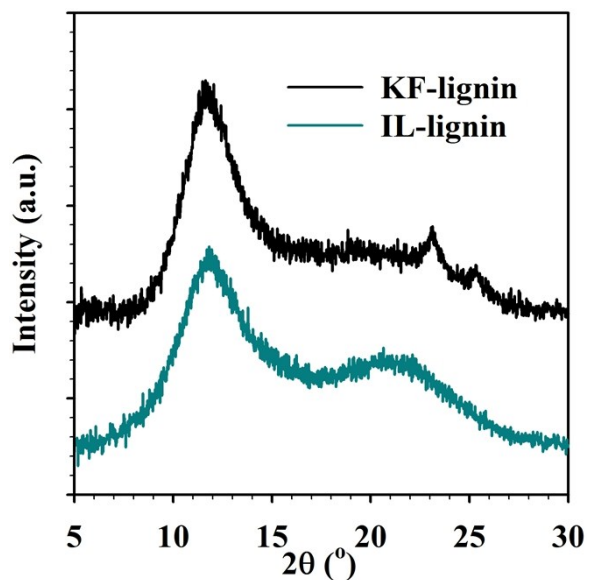

Figure S1. PXRD diffractograms of KF- and IL-lignin powder.

### *WVT determination*

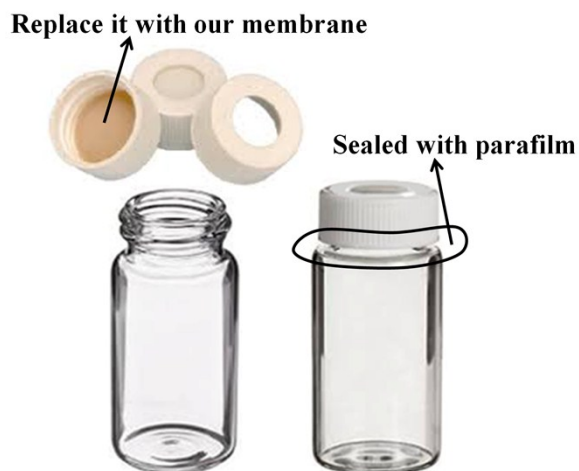

Figure S2. Water vapor transmittance (WVT) test set up.

### Calibration curve of DPPH/methanol solutions

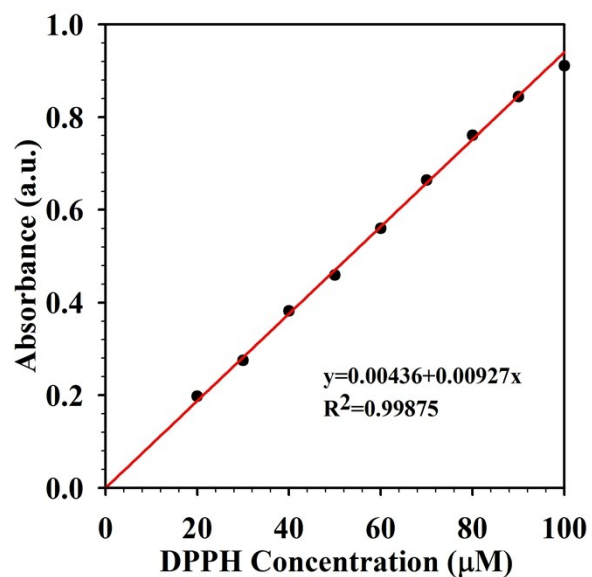

Figure S3. Calibration curve of DPPH/methanol solutions at 23 °C.

### Shrinkage of bulk gels using various drying methods

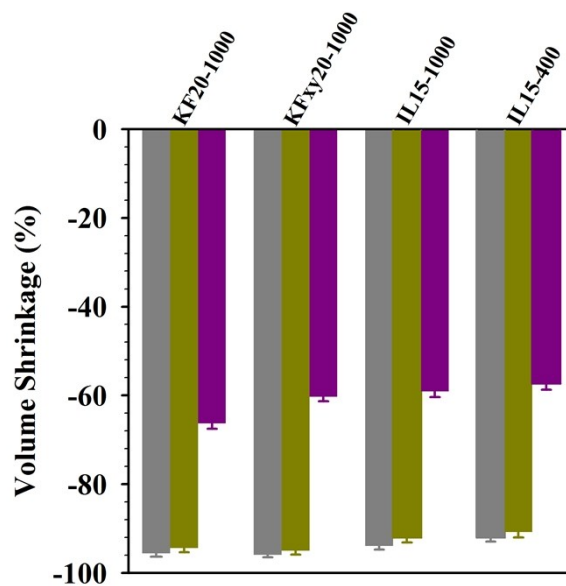

Fig. S4. Shrinkage of lignin/ETPEG bulk hydrogels after various drying methods (■) air-drying, (■) ScCO<sub>2</sub>-drying, (■) freeze-drying.



**FT-IR of lignin/ETPEG hydrogels**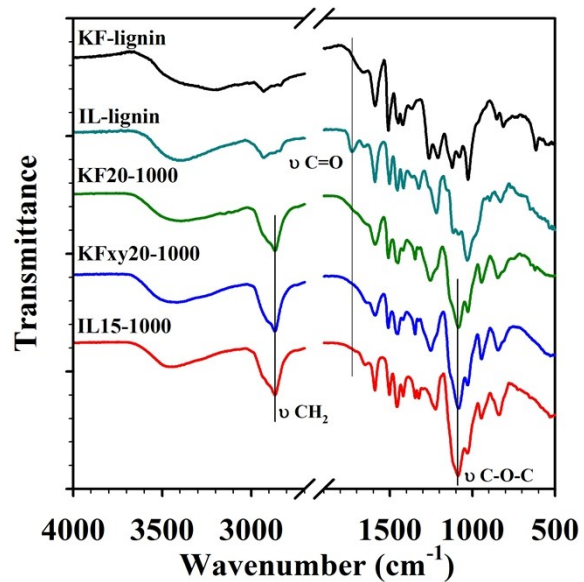

Figure S7. FT-IR spectra of lignin/ETPEG hydrogels.

**References**

1. K. Y. Cho, C. H. Kim, J. W. Lee and J. K. Park, *Macromol. Rapid Commun.*, 1999, **20**, 598-601.
